# Supplementary material for: Clinician Perceptions of Somali-American Patients in Specialized Maternal-Fetal Care
Source: Research Square preprint supplement (doi:10.21203/rs.3.rs-7409787/v1), 2025-09-04
Supplement: Supplementary file 1 [file 791d747dfe187745c35cb82b.pdf]

# Provider Perspectives and Experiences of Specialized Fetal Care in the Somali-American Community

WELCOME!

We are a team of clinical providers and researchers seeking to understand what we know and do not know about the perceptions, personal or community experiences, and barriers to care for Somali-American families regarding specialized fetal care from the view-point of both the patient and provider.

If you are a fetal care provider or clinical staff member that serves this patient population we would love to hear your perspective to build recourses to better serve our Somali-American families in the future.

This website will provide a consent form with details about the research and prompt your consent to participate if you so choose. There is no compensation for your participation.

Participation is entirely online and takes about 20-30 minutes to complete. Please answer all questions that you feel comfortable answering, and do not share any PHI when recalling experiences with former patients.

Thank you for your participation in this study!

IRB#: 2022-096

---

Informed Consent Form - Click Document to View

[Attachment: "Provider\_InformationSheet.pdf"]

---

Informed Consent

- ☐ I have read the information sheet and I agree to participate in this study
- ☐ I do not agree to participate in this study

## Demographics

Current practice center

---

Clinical role

- ☐ Maternal-Fetal Medicine
- ☐ OBGYN
- ☐ Fetal/Pediatric Cardiology
- ☐ Pediatric Surgery
- ☐ Neonatology
- ☐ Pediatric Neurosurgery
- ☐ Nursing
- ☐ Sonography
- ☐ Nurse Care Coordination
- ☐ Social Worker
- ☐ Genetic Counseling
- ☐ Administration
- ☐ Other

Describe other role

---

Approximate years in practice

- ☐ 1-5
- ☐ 6-10
- ☐ 11-20
- ☐ more than 20

Gender

- ☐ female
- ☐ male
- ☐ non-binary
- ☐ choose not to answer

Race

- ☐ Black/African American
- ☐ Indigenous/Native American/Alaska Native
- ☐ Asian
- ☐ Native Hawaiian/Pacific Islander
- ☐ White
- ☐ Multiracial
- ☐ Other
- ☐ choose not to answer

Ethnicity

- ☐ Hispanic/Latino
- ☐ not Hispanic/Latino
- ☐ choose not to answer

**Provider Personal Perspective**

What are the first thoughts that come to mind when thinking about Somali-American community values?

\_\_\_\_\_

What is your understanding of the background of Somali immigration to Minnesota?

\_\_\_\_\_

In your experience, how do your Somali-American patients perceive Western medicine?

\_\_\_\_\_

In your experience, how do your Somali-American patients specifically perceive prenatal, obstetric, and fetal care?

\_\_\_\_\_

In your experience, do you think Somali-American families are open to obstetric interventions (C-section, induction of labor)?

\_\_\_\_\_

What is your experience/opinion of how medical decisions are made in Somali-American families?

\_\_\_\_\_

In your experience, do you think there are facilitators to Somali-American patient participation in fetal care at your center? Please provide examples if able.

\_\_\_\_\_

In your experience, do you think there are barriers to Somali-American patients participating in fetal care at your center? Please provide examples if able.

\_\_\_\_\_

Are you aware of any disparities in obstetrical outcomes in the Somali-American population?

- ☐ no  
☐ yes  
☐ I don't know/cannot say

What are your impressions about why such disparities may exist?

\_\_\_\_\_

What role does western medicine have in contributing to these disparities?

\_\_\_\_\_

Has your institution taken steps to address these disparities?

\_\_\_\_\_

Do you need an interpreter to communicate medical information to your Somali-American patients?

- ☐ always  
☐ frequently  
☐ sometimes  
☐ hardly ever

If you use a Somali interpreter, do you trust that the interpreter is accurate and unbiased? Feel free to elaborate.

---

If you have to use a Somali interpreter, do you change the information in your consultations when using an interpreter? How?

---

Do you have any specific concerns about caring for the Somali-American population?

---

How should we as healthcare systems conduct outreach to the Somali-American population?

---

What would you want as training to feel better equipped to treat the Somali-American patient population?

---

If you have anything else to share, including any interesting, exemplary, or representative stories about treating a Somali-American family feel free to share here (absolutely no PHI please!)

---
