# Supplementary material for: Clinician Perceptions of Somali-American Patients in Specialized Maternal-Fetal Care
Source: Research Square preprint supplement (doi:10.21203/rs.3.rs-7409787/v1), 2025-09-04
Supplement: Supplementary file 1 [file b78a130c6cf485c33040eda6.docx]

**Supplemental Table.** Respondent themes and supporting quotations (see supplemental material for expanded participant quotation selection)

| **Language Barriers** |
| --- |
| ***Translation Accuracy/Importance of Interpreter Training in Maternal-Fetal Diagnosis*** |
| “I worry about accurate interpretation.” #6  “I have concerns related to the accuracy of translations.” #20  “I do not always trust that the interpreter is either accurate or unbiased. This has become evident when I have had returning Somali-American patients return and they seem to have a different understanding of what was previously discussed. Also, not all words seem to be translated as at times the works that I say are repeated in English.” #66  “Not all interpreters are made equal. If there is no one in the patient’s family that can speak English and you are completely dependent on an interpreter it can be hard to know if the information is getting to the patient correctly.” #57  “Lack of/poor interpretation. We NEED interpreters with fetal/OB specific knowledge to make sure these patients have a good understanding of what is going on with their pregnancies.” #69  “I used to trust them more but have had some patients in various languages say the interpreters are not doing a good job. It makes me more hesitant.” #67  “There are usually interpreters available, but I don't know if the interpreters are actually medically certified or not. I also don't know if the interpreter is conveying the correct information the patient needs as I do not know the Somali language myself.” #75  “The in-person interpreter needs to be familiar with obstetric terms and interventions so they can readily translate.” #63  “I do feel that when we have a very knowledgeable Somali interpreter that the patient is comfortable with and that understands the medical terminology and can explain it well to the patient, they are more willing to participate.” #69  “Yes, the interpreters don't seem to know many of the cardiology terms (and I can't tell if they are even conveying the correct diagnosis). I use simplistic language and feel like I don't touch on many important aspects of prenatal counseling.” #39  “My largest concern is related to ensuring the patient/family understand the counseling because the interpreters feel variable in their quality and scope.” #64 |
| ***In-person Interpreters*** |
| “I feel the biggest barrier to providing good care and having the patient participate in fetal care is the language barrier.” #75  “The biggest barrier is language barriers and understanding” #67  “Despite my best efforts, I do not feel like I provide equivalent care to Somali-American patients - there is a cultural barrier, a language barrier, and what feels like a chasm between the patient and provider. I feel like due to these limitations; they receive limited counseling and I am unable to confirm their understanding of the fetal findings and care plan.” #39  “I think that sometimes explanations become much shorter or less detailed, because it can be cumbersome to use a digital interpreter. With an in-person interpreter, I feel less inclined to shorten long descriptions” #60  “I feel when we have an in-person interpreter it makes the visit go more smoothly, along with information that we rely to patients. The patients feel more comfortable when there is an interpreter present.” #43 |
| ***Appointment time constraints*** |
| “Often give less information due to time constraints.” #25  “I do not speak as often or tell them as much on the ultrasound because it is so much work to repeat myself all the time in order to communicate with them.” #41  “For any interpretation appointment, I often try my best to use some basic terms initially to ensure there are appropriate translations. Many genetic terms may not have a straightforward translation, in any language” #47  “Due to time constraints I will try to use direct language instead of expanding or saying it more than one way” #10  “I definitely have to simplify my words and explain what each word means.” #48  “I do change the information in my consultation by trying to use more basic terminology.” #66  “I may make a point to use more plain language when using an iPad or phone interpreter, but less so when there is an in-person interpreter.” #46  “I often find that I am simplifying the information I am presenting, and sometimes not able to present the same depth of information as I would to an English-speaking patient.” #68 |
| ***Interpreter gender discordance*** |
| “If the in-person interpreter is a male then it may hinder conversation based on the traditional Somali value of women's privacy.” #63  “I question whether female patients feel comfortable expressing their questions/concerns with a male interpreter.” #6 |
| **Islamic Faith** |
| ***Belief in predomination creates a hesitance towards intervention*** |
| “Faith seems to be present in many of my counseling sessions about fetal anomalies or unexpected findings.” #55  “Their faith in God surpasses belief in Western Medicine. When discussing fetal concerns with Somali-American patients they may not either believe the information discussed, or choose to believe that it is God's will and that everything will be okay.” #66  “Some are resistant to learning about the diagnosis and have full belief in God's will.” #78  “Many patients are interested in doing all that is possible for their pregnancy, while also noting that some factors are out of our control. Many patients report strong religious beliefs which impact their feelings towards possible outcomes based on the diagnosis (i.e. "it's in god's hands").” #20  “Skeptical of many recommendations -- they want the best for their babies but are not sure that what we recommend will lead to the best outcomes. Also fatalist -- if a bad outcome happens it was God's will and couldn't have been prevented regardless of care.” #25  “I reflect on how many of my Somali-American patients have declined intervention or cesarean when recommended, I wonder if they find Western medicine too interventional and often I have heard "it's in God's hands." #60  “some patients are skeptical of the information we provide about fetal anomalies, waiting until birth to see for themselves, expressing faith in God's will over medical opinions” #62  “Some are resistant to learning about the diagnosis and have full belief in God's will. Others are open to medical recommendations.” #78  “I feel over the last 15 years the perception is changing. Early on in my labor and delivery career. There was a lot of mistrust and refusal for these procedures, as I believe it came from a place of fear of the unknown based on previous experiences in home country.” #78  “I think they trust our expertise but also will have faith that the baby may be cured before or after birth due to their religious beliefs. Typically do follow our recommended care plans.” #28  “They are very accepting of the diagnosis and tend to be receptive to our recommendations re: care plans. I have also been blessed with families who when I am grieving the loss of their child tell me that it was out of all of our hands because of their faith - lack of blame on the caregivers and expression of gratitude is typical.” #39  “Faith centered care is important.” #7  “Faith that only God knows the plan for our lives and we should not interfere in that.” 62  “It can be challenging for the medical team to understand how Somali Americans are able to rely so heavily on faith when we have scientific evidence their child will have a limited life span. I find it difficult to navigate when parents are not on the same page regarding treatment plan or end of life/memory making goals.” #73 |
| **Multiple Opinions in Medical Decision Making** |
| ***Family, elders, faith leaders, and the greater community*** |
| “Similar to my other families. Parental discussion; sometimes with their other family members or with their faith leaders.” #28  “Opinions of elders/others in the family unity are weighted heavily.” #21  “Since they do often have a large community of support, there is also a large community of opinions. I do feel they get "caught in the middle" of community opinion and medical opinion.” #10  “It can be financially difficult to get all the members of the patient’s family to be present at the time the information is being discussed so that they can all hear and understand. I think that if they cannot all hear it then there is a harder time getting buy-in.” #57  “With guidance from family elders, families have faith that only God knows the plan for our lives and we should not interfere in that.” #62  “I presume extended family is included if they aren't present, but are referenced - and spiritual or community leaders. This is not always the case and there is variation within the Somali-American families I have worked with.” #55 |
| ***Patriarchal Values*** |
| “Men often are the leaders and decision-makers in the family.” #13  “Traditional households with men at the head and mothers as caretakers” #48  “Male partners/family members are the main decision-makers in the household/community” #43 “Paternal driven, although it seems that the patient does have input - seems cultural to defer a decision until spoken with husband, but tends to follow what the woman wants eventually” #15  “The father makes the decision in most cases.” #41  “Making sure the patients have a voice in their own decision making.” #82  “Historically, most of my experience with the Somali-American families have involved medical decisions being made by the patient's husband, elders, and/or community leaders. This has been difficult to accept by some of us care providers as ultimately we feel the decisions should be made by the patient we are directly caring for. I have learned a lot about cultural beliefs and practices in more recent years, so it has been a good learning curve for me. I also feel more Somali women are becoming more "independent" so some of them are making decisions on their own now.” #75  “Women seem to have more independent decision-making ability in more recent years. There seemed to be heavier input from husbands and families 5-10 years ago.” #10  “I believe there is communication between the couple. For mothers, who are non-English-speaking and husbands are, makes seem to be more of the decision-makers.” #78 |
| **Mistrust in Care** |
| ***Mistrust of western medicine*** |
| “They are frequently mistrustful of Western medicine due to personal experiences or stories they've heard from trusted family members/friends.” #73  “I feel there is a lot of mistrust Somali families experience of Western Medicine in general.” #73  “They are fearful and there is a sense of mistrust.” #13 |
| ***Skeptical of prenatal diagnoses*** |
| “Hesitant to accept or believe prenatal diagnoses” #64  “In a lot of my experience, they do not trust it and feel that we (our doctors) cannot know how their baby will do after birth.” #69  “In my experience many families are very willing to come in for ultrasounds, however do not believe diagnosis during pregnancy or make plans for what may happen for baby after birth. So much of the planning for baby happens once baby is born.” #16  “I have had several families that have not wanted to believe their child has heart disease until confirmed postnatally; once confirmed after birth, however, they are very accepting of the diagnosis and tend to be receptive to our recommendations re: care plans.” #28  “Seem very skeptical. Often state that they do not believe or accept the diagnosis being explained. Will accept diagnosis only if confirmed after baby is born.” #39 |
| ***Trust between the patient and provider*** |
| “Lack of understanding of how to communicate with different culture and poor approach to patients who come to us with substantial level of mistrust and misunderstanding.” #15  “My biggest concern is when there is a complication to the pregnancy that could result in a poor outcome for either the baby or the mother it can be challenging to feel certain they understand and trust what you are telling them but then also supporting their decisions. I do not want to come across like I am pushing my opinion on them they do not agree with but I also want to be sure they have a clear understanding. This can be a tricky balance.” #57  “Once you break that wall, then mistrust occurs and what you have to say does not matter any longer” #43  “I know there are studies that show that race concordance between patients and providers improves outcomes. I try my best to not impose my personal beliefs and meet patients where they are while recognizing that they may not trust me right off or may hesitate to approach things the way I would” #60  “We need a consistent female interpreter who is schooled in obstetric and fetal intervention terminology and know how to translate the terminology to Somali. This allows the patient to establish trust with the same interpreter over time and allows for consistent messaging. Without this, I fear important information could be lost in translation and/or could cause a gap in care that further drives mistrust from the patient to the healthcare team.” #63  “I cannot emphasize enough how much we need to provide equal care to ALL of our patients. I take pride in the care I provide our prenatal cardiology patients and I am saddened by the poor care I am able to offer these patients because of limits in communication and cultural understanding - which I think leads to trust issues on the prenatal and subsequently on the postnatal side. In my opinion, I believe that the long-term outcome of Somali-American babies is more guarded due to challenges in communication and trust between the medical team and families.” #39  “When I get the chance to see the same/patient multiple times in the pregnancy I can feel the walls come down and the trust build. We build an understanding and mutual respect. When this happens I feel I can quickly pick up on a change in their health and they are willing to listen to the recommendations.”  “In my experience there is a lot of hesitation to accept these interventions and it often takes days or weeks of discussing it and building trust.” #57 |
| **Desire to provide equitable care** |
| ***Acknowledging differing cultural values*** |
| “Despite my best efforts, I do not feel like I provide equivalent care to Somali-American patients - there is a cultural barrier.” #39  “I try my best to not impose my personal beliefs and meet patients where they are while recognizing that they may not trust me right off or may hesitate to approach things the way I would.” #60  “I worry about being sensitive to their needs and ensuring I am not saying something that may be perceived incorrectly (ex. trying to explain/plan for a suboptimal outcome with frustration from the patient because only Allah knows what will happen).” #6  “Trying to provide culturally competent care where you can understand why someone might not accept your recommendation, but find the safest common ground is not always easy, so may push patients away completely.” #60  “Providers may "expect" patients to accept the information they provide and not question it (i.e. our baby will be cured because of our faith) and feel frustrated if their expertise is not accepted without question” #28  “Western medicines idea of high risk is actually fairly low risk situations. I think this is hard for many people with recent personal or family hx of life in a developing country to accept. A 10% risk in our medicine is very high. A 10% risk for them may be very low. Having this difference in opinion does sometimes create communication/trust barriers.” #10  “More training on how to approach decision making, how to review bad news or recommendations in a way that is more respectful and supportive of the patients and their families.” #51  “I think that training on the Somali culture would be very beneficial in understanding how to better care for this population.” #66  “Understanding community values and cultural norms within the Somali-American community, taught by Somali-Americans.” #60  “Lots of provider education on culture, ways to support and communicate with these patients, how to build trust, how to optimize their experience and care for them and their baby. Would probably be best if representatives of the Somali-American community were the ones teaching us!” #39 |
| ***Need for Somali-American providers and cultural liaisons*** |
| “There are no Somali-American care providers at any level of care (care coordinators, nurses, physicians)” #68  “We need to have a Somali representative that currently works with perinatal patients, who understand the lingo, because the practice of any medicine is so specific now.” #43  “Yes, I think having a specific Somali-American care coordinator or social worker may be helpful in bridging some of the misunderstandings.” #47  “The health system is very different here than that they might have experienced previously and it would be nice to have peers for patients within the health system to help them navigate.” #51  “It would be SO helpful to have someone advocate for them from their community” #13  “We do use Imams for some antenatal counseling which helps.” #49 |
| ***Aiding under-resourced families*** |
| “I have also noticed that childcare and transportation appear to be common problems listed by patients for getting to appointments.” #63  “Transportation is also a major issue, which families often cite as their limitation.” #29  “We do not allow children under the age of 5 years to attend visits, and with the women being the primary care for their children, this can make attending appointments challenging at our center.” #48  “There are definitely cultural and socioeconomic barriers to care delivery.” #46  “There also seems to be SES challenges with attending visits due to work schedule, kids, or lack of transportation.” #20  “They see that prenatal care is important but so is family support. Sometimes visits are not as frequent due to other family resources” #49 |
